# Supplementary material
Source: PubMed Central journal article supplement (PMC2773974)
Supplement: 0908767106_0908767106SI.pdf [file 0908767106_0908767106SI.pdf]

# Supporting Information

Wegorzewska et al. 10.1073/pnas.0908767106

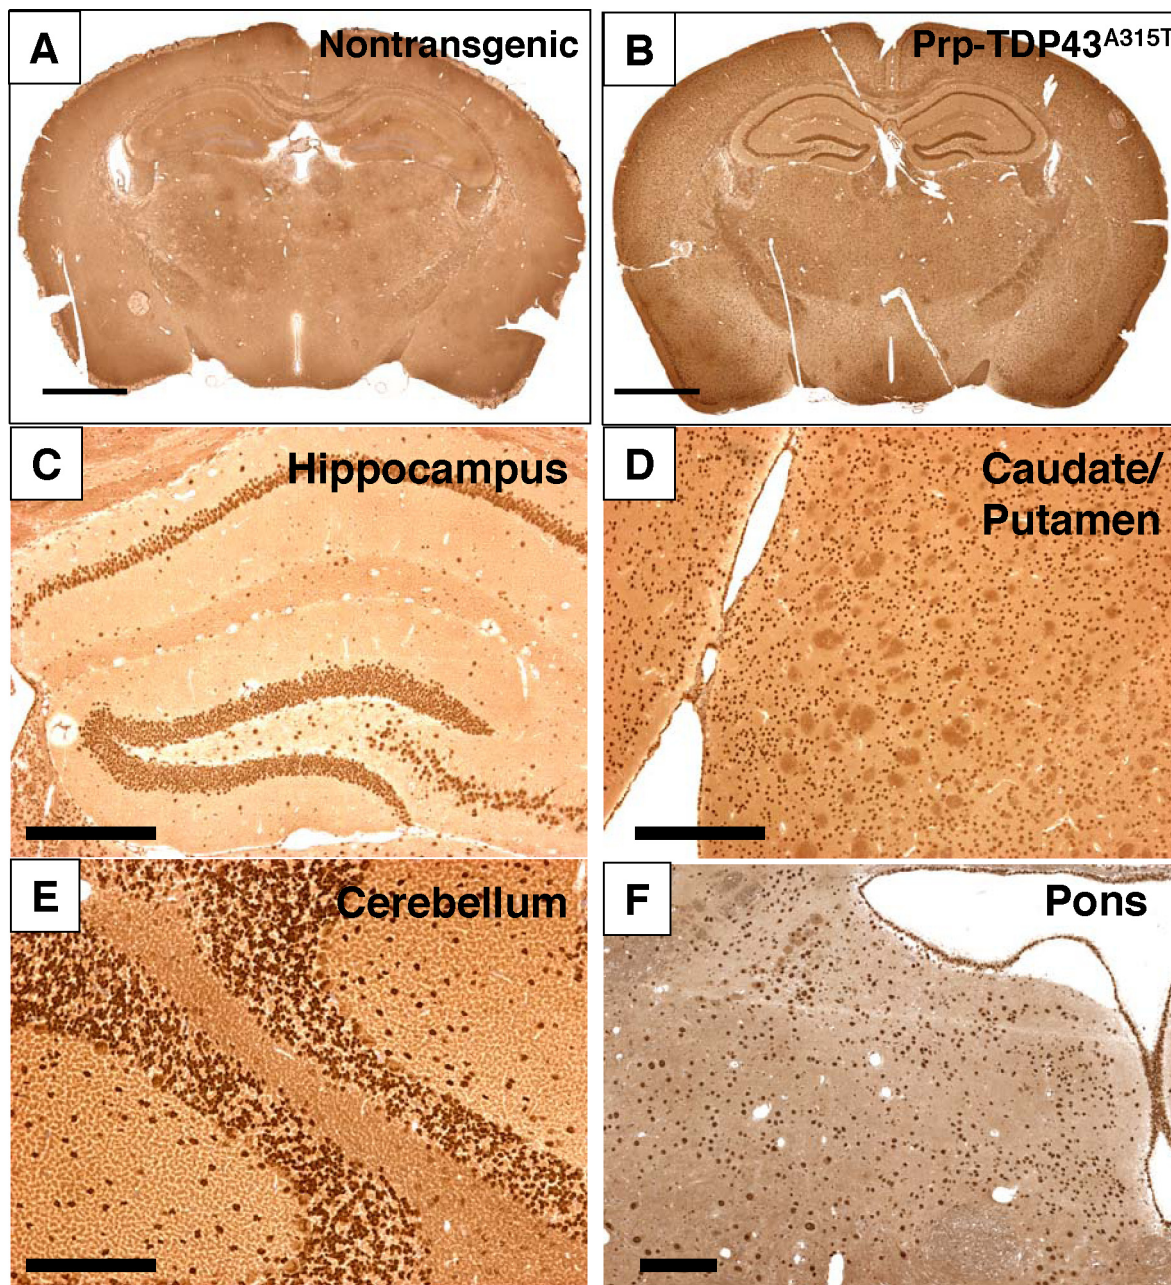

**Fig. S1.** Expression of the TDP43<sup>A315T</sup> transgene in neurons and glia is present throughout the nervous system in Prp-TDP43<sup>A315T</sup> mice. Immunohistochemistry with anti-Flag antibody, which is inserted at the N terminus of the human TDP43<sup>A315T</sup> transgene. No staining was seen in nontransgenic littermate mouse brain (A), whereas nuclear staining was seen in neurons and non-neuronal cells in all brain regions in Prp-TDP43<sup>A315T</sup> mice (B–F). This included all areas of hippocampus (C), caudate/putamen (D), cerebellum (E), and brainstem structures including the pons (F). (Scale bars for A and B, 1.25 mm; scale bars for C–F, 200  $\mu$ m.)



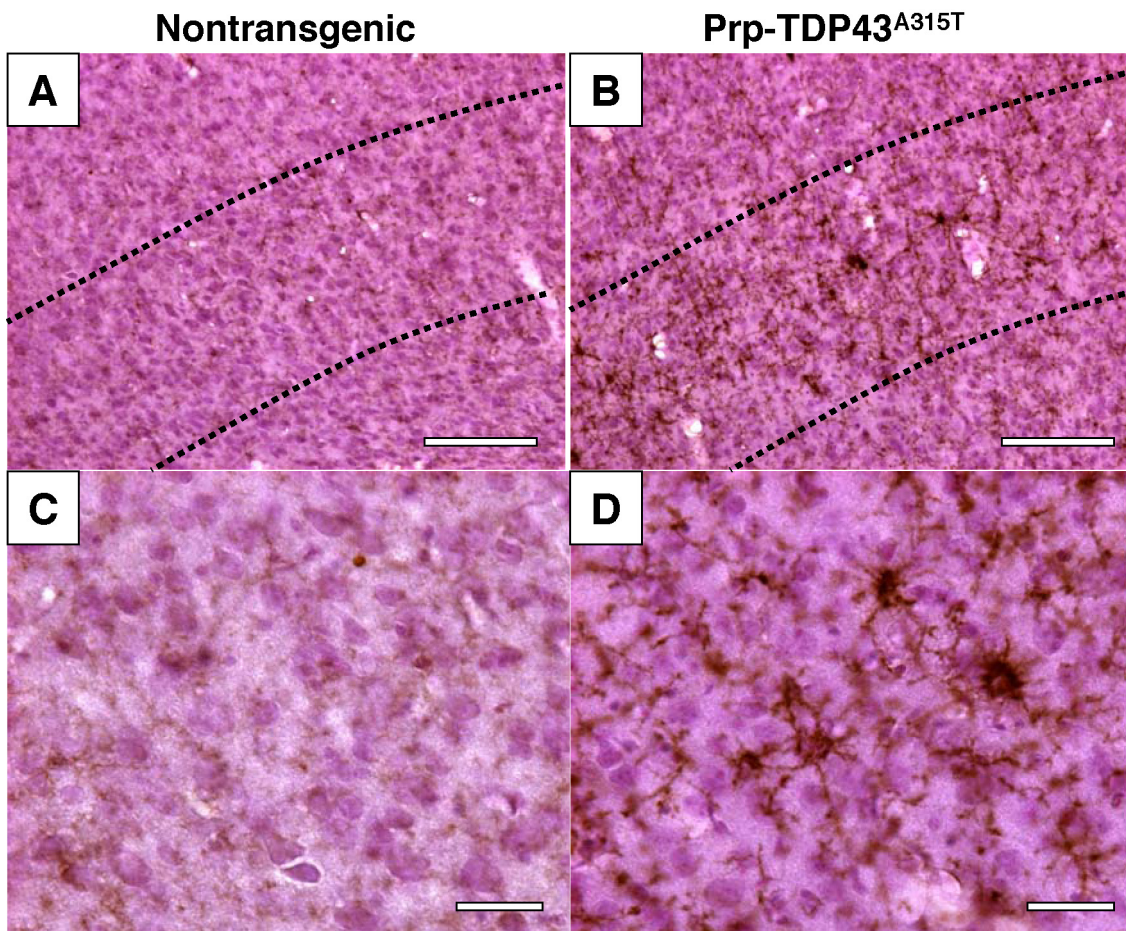

**Fig. S2.** Microglial activation in cortex of Prp-TDP43<sup>A315T</sup> mice. CD11b immunostain of motor cortex from nontransgenic (A and C) and Prp-TDP43<sup>A315T</sup> mice (B and D). Activated microglia were seen predominantly in layer 5 of cortex (demarcated by dashed lines in A and B). Higher magnification images (C and D) show large stellate activated microglia staining with CD11b selectively in Prp-TDP43<sup>A315T</sup> cortex. (Scale bar for A and B, 100  $\mu$ m; scale bar for C and D, 25  $\mu$ m.)



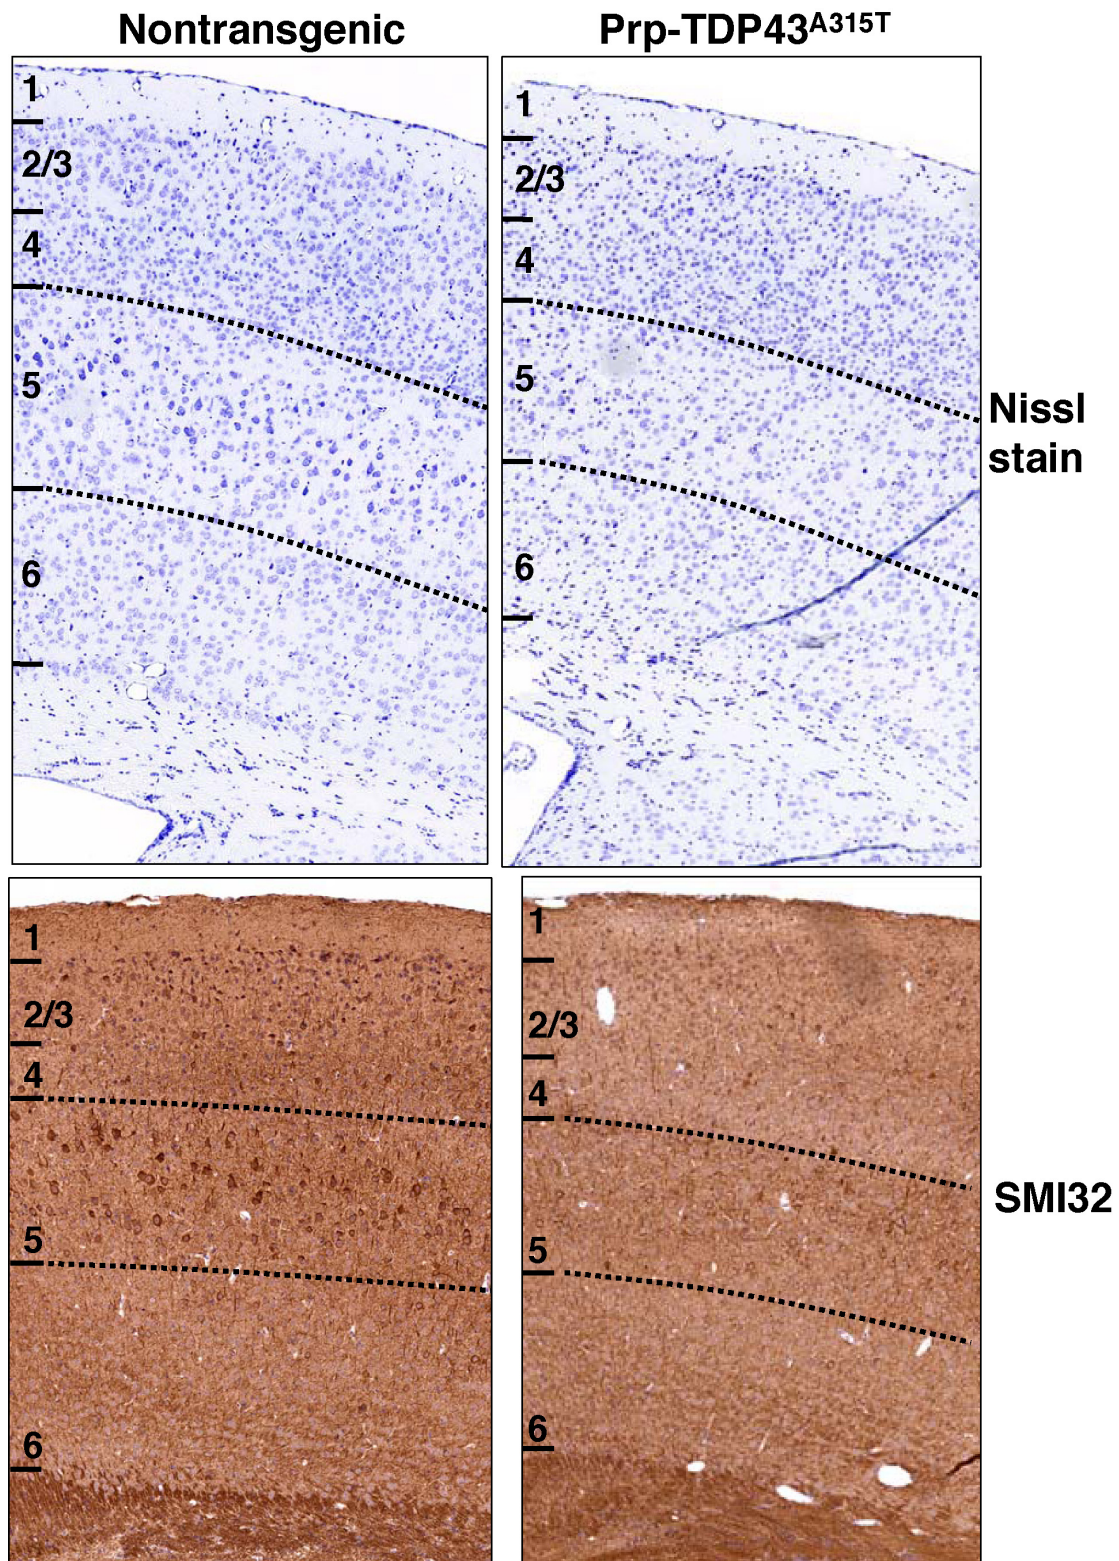

**Fig. S3.** Neuronal loss in cortex of Prp-TDP43<sup>A315T</sup> mice. Brain sections from motor cortex are shown with Nissl stain (top panels) and SMI32 immunostaining (bottom panels) from a nontransgenic control and Prp-TDP43<sup>A315T</sup> mouse. In nontransgenic littermates, numerous neurons with dark Nissl stain (Nissl bodies, corresponding to rough endoplasmic reticulum) are seen in layer 5, but are absent in end stage Prp-TDP43<sup>A315T</sup> transgenic mice. A similar decrease was seen in the number of neurons visualized by immunohistochemistry with SMI32, a monoclonal antibody which recognizes unphosphorylated neurofilament, and preferentially labels layer 5 pyramidal neurons.



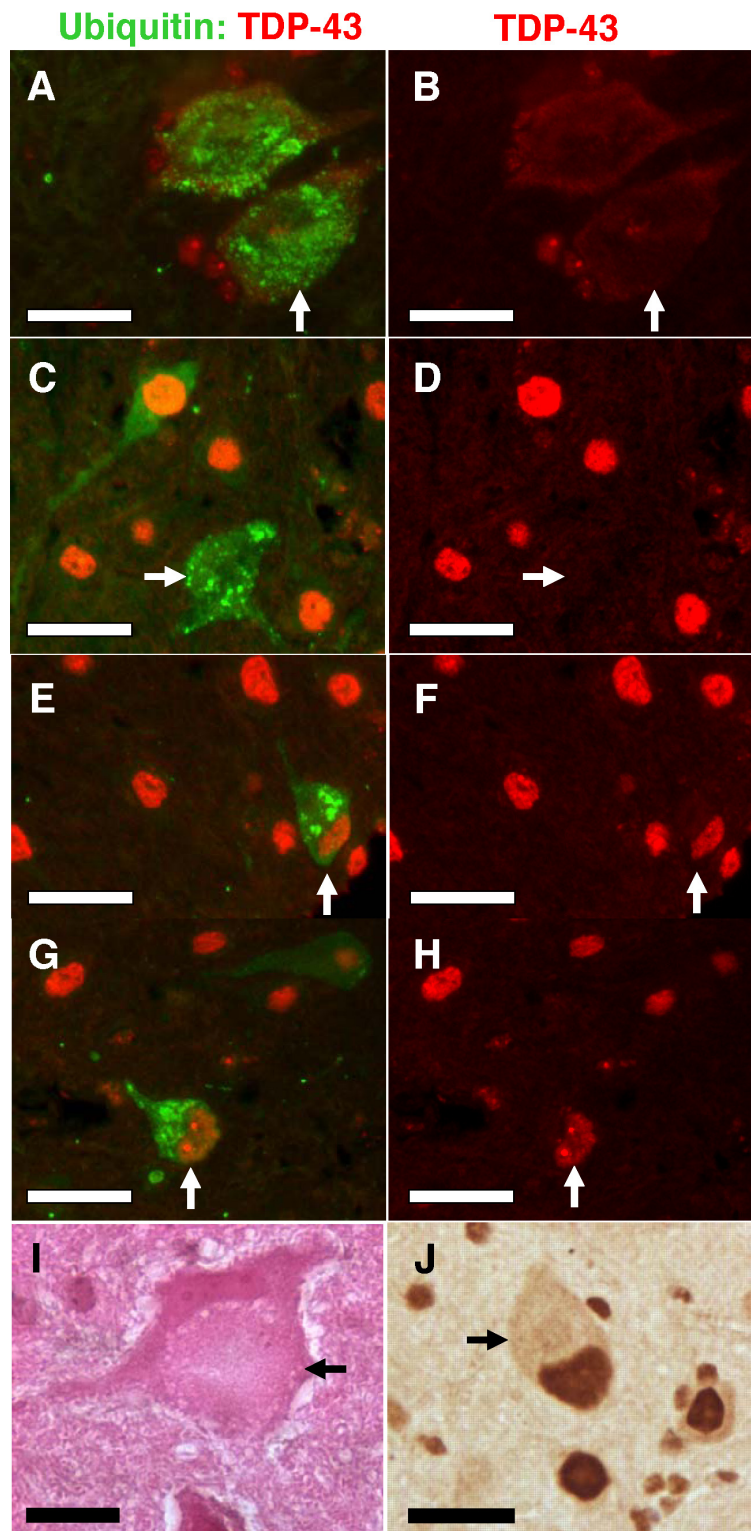

**Fig. S4.** Ubiquitin aggregate pathology in spinal cord ventral horn neurons. Overlay images of double immunofluorescence labeling of ubiquitin (green) and TDP-43 (red) (*A, C, E, and G*), or TDP-43 alone (*B, D, F, and H*). Some large ventral horn neurons with ubiquitin positive aggregates showed loss of nuclear TDP-43 staining, with occasional increase in diffuse cytoplasmic TDP-43 staining (*B*), but more commonly no cytoplasmic TDP-43 was detected (*D*). Other cells with ubiquitin aggregates appeared to have peripherally displaced nuclei with retained nuclear TDP-43 staining (*F and H*). White arrows point out the same neuron in both columns. (Scale bars, 20  $\mu\text{m}$ .) (*I*) H&E stain of a large ventral horn neuron in the spinal cord showing an eccentrically displaced nucleus, with a large amorphous aggregate in the cell body (arrow). (Scale bar, 10  $\mu\text{m}$ .) (*J*) TDP-43 immunostaining showing ventral horn neurons with a TDP-43 positive eccentric nucleus, and a TDP-43 negative aggregate displacing it. (Scale bar, 20  $\mu\text{m}$ .)

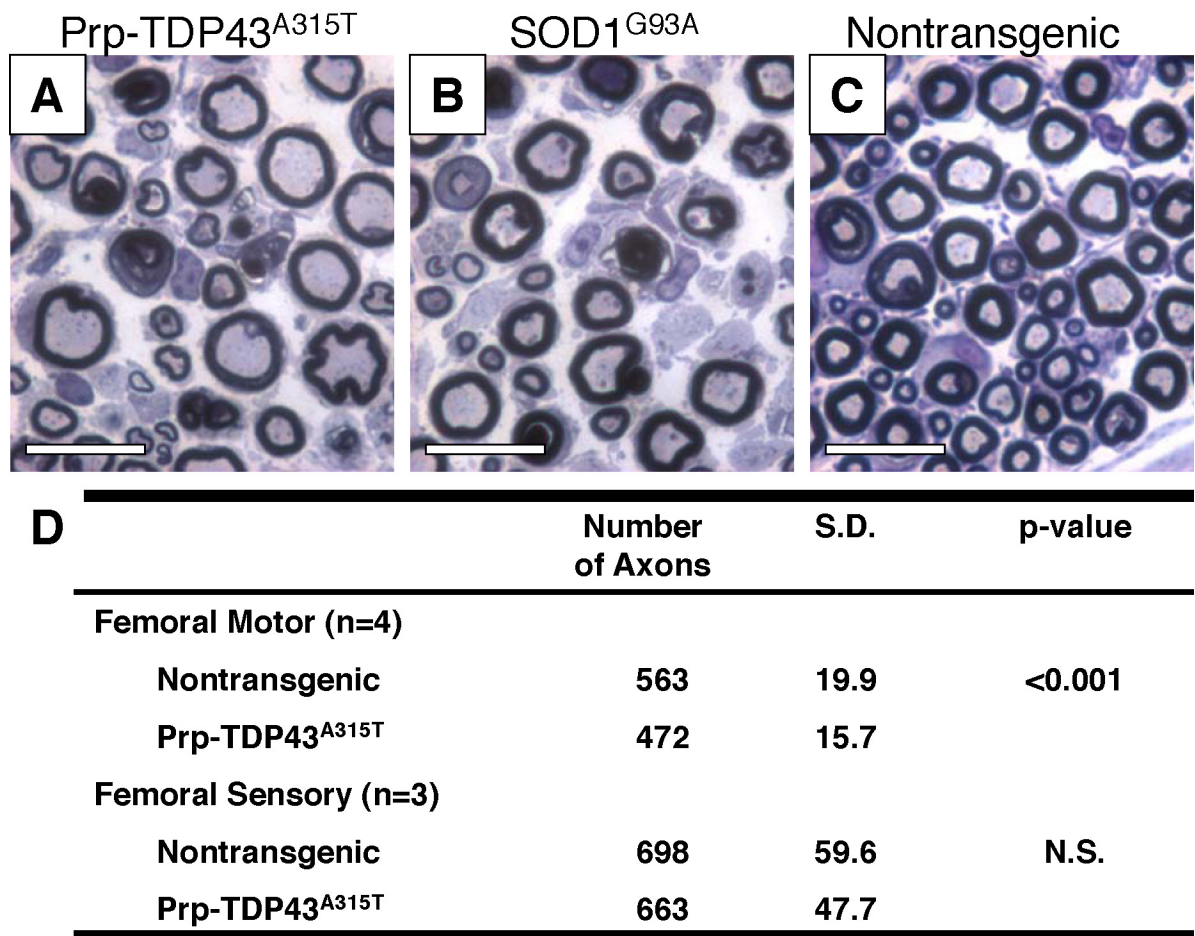

**Fig. S5.** Axon degeneration and loss in femoral motor nerves from Prp-TDP43<sup>A315T</sup> mice. (A–C) Toluidine blue-stained plastic sections of femoral motor nerves from Prp-TDP43<sup>A315T</sup> (A), SOD1<sup>G93A</sup> (B), and a non-transgenic mouse (C) showing degenerating axonal profiles in Prp-TDP43<sup>A315T</sup> mice. (Scale bar, 10  $\mu$ m.) (D) Quantitation of intact motor axons showed significant loss of femoral motor axons in Prp-TDP43<sup>A315T</sup> mice compared to non-transgenic controls.

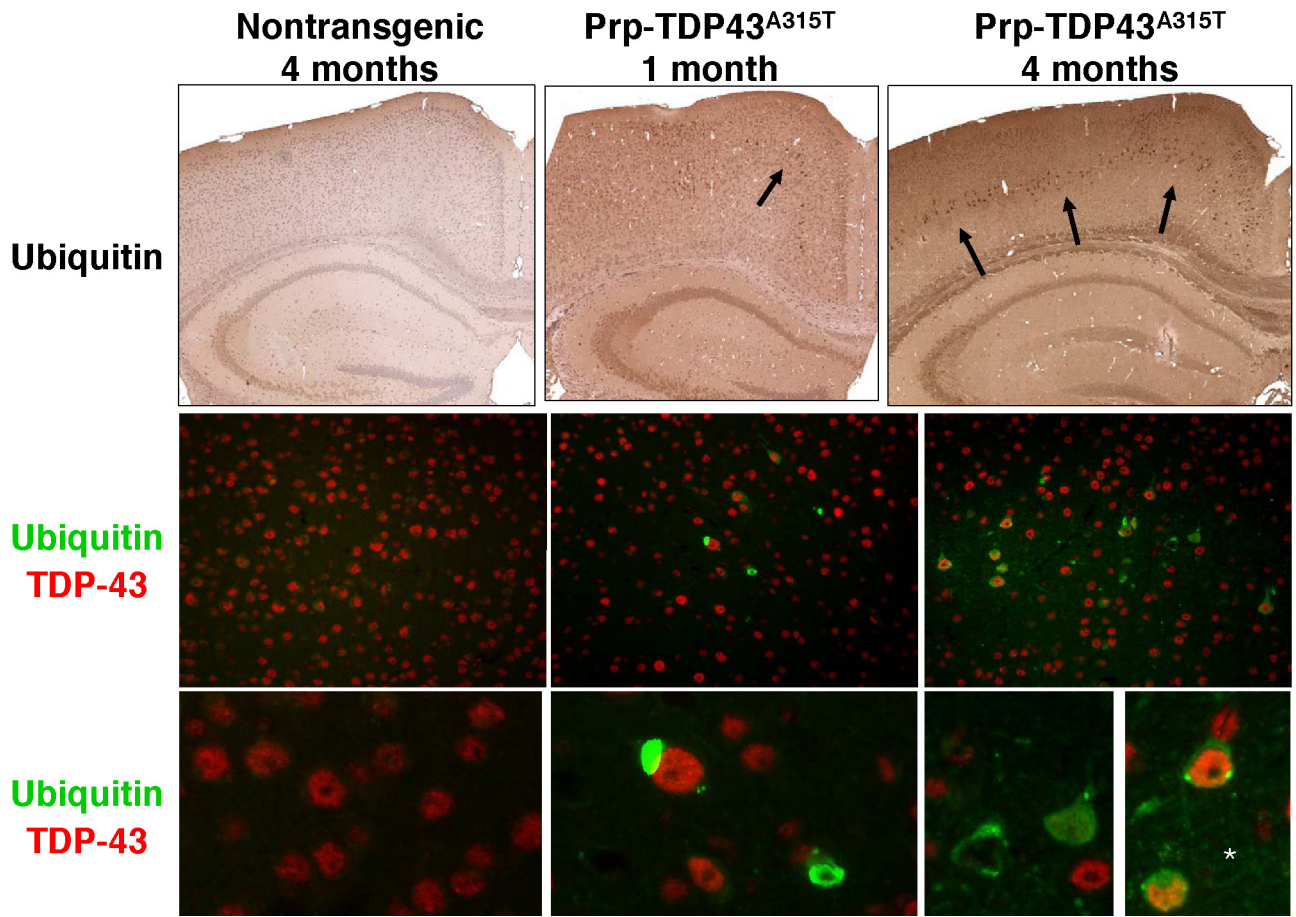

**Fig. S6.** Time course of ubiquitin aggregate pathology in Prp-TDP43<sup>A315T</sup> mice. Top panels: ubiquitin immunohistochemistry of brain sections from Prp-TDP43<sup>A315T</sup> mice at 1 month of age (presymptomatic) and at 4 months (late stage). At 1 month of age rare neurons are seen (here in retrosplenial cortex) with ubiquitin aggregate pathology, in contrast to the widespread pathology in layer 5 seen in late stage animals. Middle and bottom panels: double immunofluorescence for ubiquitin (green) and TDP-43 (red). Although ubiquitin aggregates could occasionally be found in 1-month-old animals, no loss of nuclear TDP-43 staining was seen. In contrast, ubiquitin aggregate pathology was widespread in cortex in late stage animals, with more frequent loss of nuclear TDP-43 (arrows). Note also the increase in ubiquitin staining seen in neuronal processes throughout the neuropil of layer 5 (asterisk in bottom right panel).

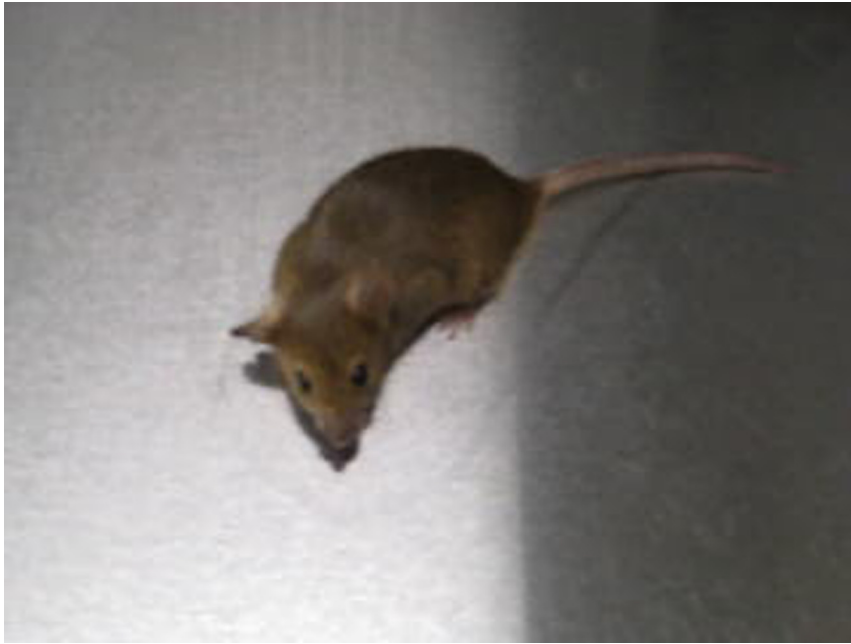

**Movie S1.** Four-month-old Prp-TDP43<sup>A315T</sup> mouse, showing typical early appearance of gait difficulty.

[Movie S1 \(AVI\)](#)



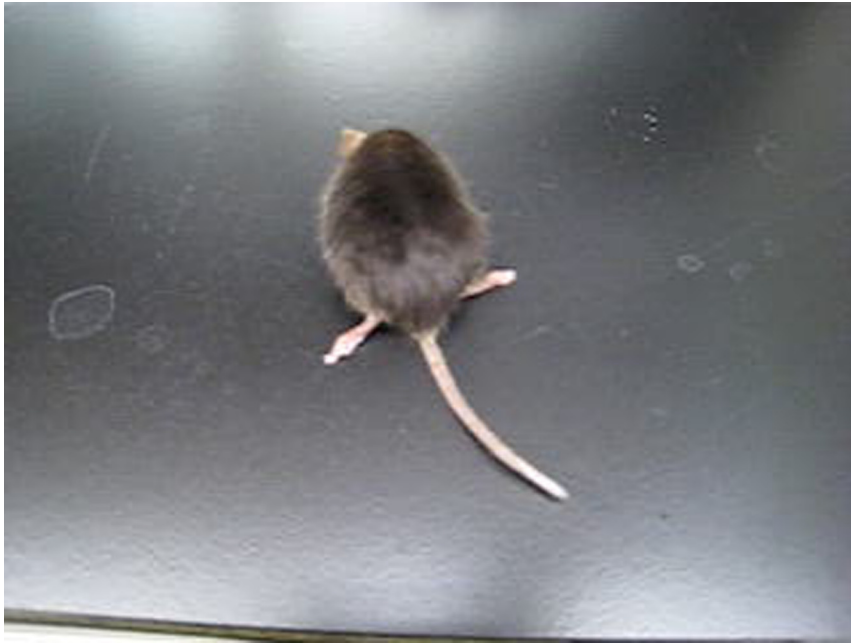

**Movie S2.** Characteristic “swimming” gait seen in a late stage 5-month-old Prp-TDP43<sup>A315T</sup> mouse. The mouse is unable to stand with its abdomen off the ground, and slides along the surface using its limbs in a “flipper” like fashion to ineffectively propel itself.

[Movie S2 \(AVI\)](#)



**Table S1. Regional distribution of ubiquitin aggregate pathology in the nervous system of late stage Prp-TDP43<sup>A315T</sup> mice**

| Region                                                                                            | Ubiquitin cytoplasmic inclusions |
|---------------------------------------------------------------------------------------------------|----------------------------------|
| Cortex (predominantly layer V)                                                                    |                                  |
| Orbital, frontal association, motor, cingulate, insular, sensory, retrosplenial, visual, auditory | +++                              |
| Pyriform, ectorhinal, entorhinal                                                                  | -                                |
| Hippocampus                                                                                       |                                  |
| Polymorphic dentate gyrus, subiculum                                                              | +++                              |
| Granular cell layer (CA1, CA2, CA3)                                                               | -                                |
| Basal ganglia                                                                                     |                                  |
| Caudate/putamen, thalamus                                                                         | -                                |
| Cerebellum                                                                                        |                                  |
| Deep nuclei                                                                                       | +                                |
| Purkinje cells, molecular layer, granular cells                                                   | -                                |
| Brainstem                                                                                         |                                  |
| Midbrain: red nucleus                                                                             | +                                |
| Pons: vestibular nuclei                                                                           | +                                |
| Medulla: hypoglossal nucleus, reticular nuclei                                                    | +                                |
| Spinal cord                                                                                       |                                  |
| Ventral horn                                                                                      | ++                               |
| Dorsal horn                                                                                       | -                                |
| Dorsal root ganglia                                                                               | -                                |
